# Supplementary material for: Brief communication: An empirical relation between center frequency and measured thickness for radar sounding of temperate glaciers
Source: Copernicus journal article supplement (doi:10.5194/tc-15-2569-2021), 2021-06-07
Supplement: Supplementary file 1 [file tc-15-2569-2021-supplement.zip]

Archive with 3 entries (3 files):
- tc-15-2569-2021-supplement-title-page.pdf
- T_supplement.csv
- temperate_sounding_supplement_readme.pdf
