# Supplementary material for: Brief communication: An empirical relation between center frequency and measured thickness for radar sounding of temperate glaciers
Source: Copernicus journal article supplement (doi:10.5194/tc-15-2569-2021), 2021-06-07
Supplement: Supplementary file 1 [file tc-15-2569-2021-supplement.zip › tc-15-2569-2021-supplement-title-page.pdf]

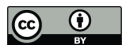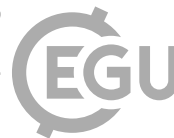

## *Supplement of*

# **Brief communication: An empirical relation between center frequency and measured thickness for radar sounding of temperate glaciers**

**Joseph A. MacGregor et al.**

*Correspondence to:* Joseph A. MacGregor ([joseph.a.macgregor@nasa.gov](mailto:joseph.a.macgregor@nasa.gov))

- [tc-15-2569-2021-supplement-title-page.pdf](#)
- [T\\_supplement.csv](#)
- [temperate\\_sounding\\_supplement\\_readme.pdf](#)

The copyright of individual parts of the supplement might differ from the article licence.
